# Supplementary material for: Rational design of Au@Pd core–shell cocatalyst on titanium dioxide enabling selective photocatalytic formation of deuterated alkane from lauric acid and heavy water
Source: Royal Society of Chemistry journal article supplement (doi:10.1039/d5ra08602g), 2026-01-01
Supplement: d5ra08602g1.pdf [file d5ra08602g1.pdf]

Supplementary information

**Rational Design of Au@Pd Core–Shell Cocatalysts on  
Titanium Dioxide Enabling Selective Photocatalytic  
Formation of Deuterated Alkanes from Lauric Acid and  
Heavy Water**

Haifan Huang and Hisao Yoshida\*

Graduate School of Human and Environmental Studies, Kyoto University,  
Yoshida-nihonmatsu-cho, Sakyo-ku, Kyoto 606-8501, Japan

\* Corresponding author: [yoshida.hisao.2a@kyoto-u.ac.jp](mailto:yoshida.hisao.2a@kyoto-u.ac.jp)

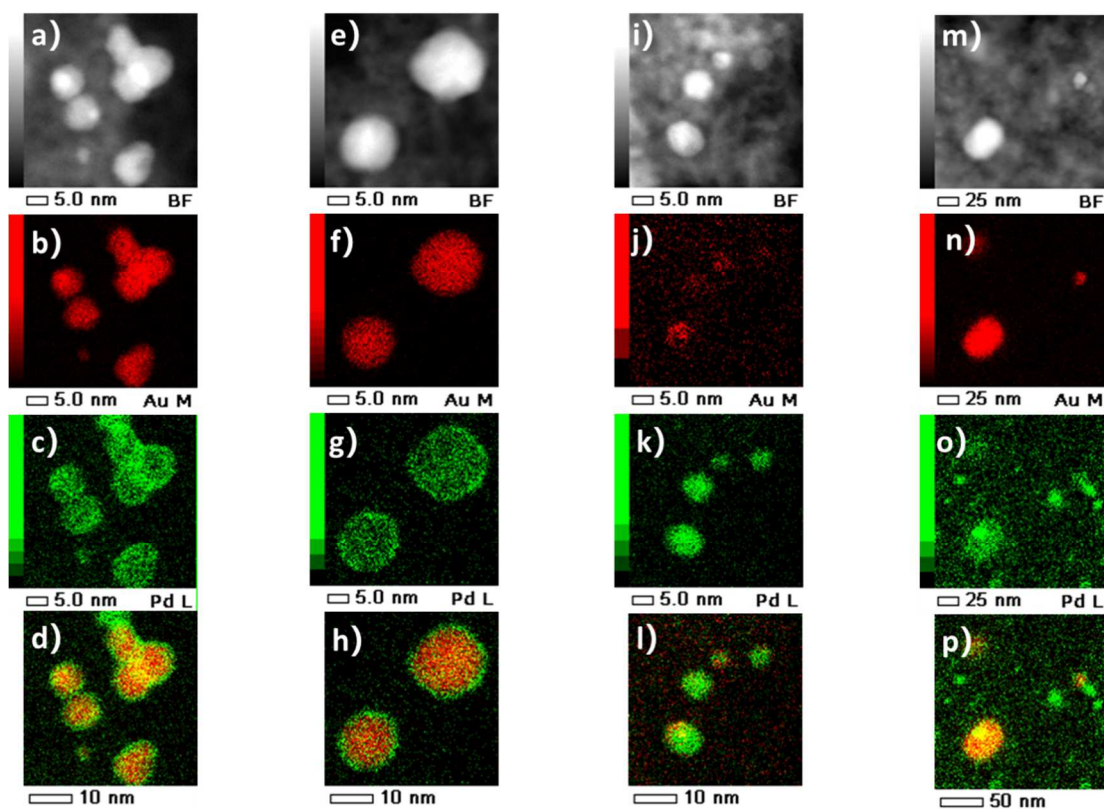

Fig. S1 STEM-EDX elemental mapping of the samples: (a-d) Au1@Pd2/TiO<sub>2</sub>, (e-h) Pd2/Au1/TiO<sub>2</sub>, (i-l) Au1/Pd2/TiO<sub>2</sub>, and (m-p) Pd2(PD)/Au1(CR)/TiO<sub>2</sub>. The SPD and PD method was carried out with the light intensity of 76.2 mW cm<sup>-2</sup> and with methanol as a sacrificial reagent. The images (a-d) are reproduced from reference,<sup>S1</sup> Copyright 2026, Elsevier.

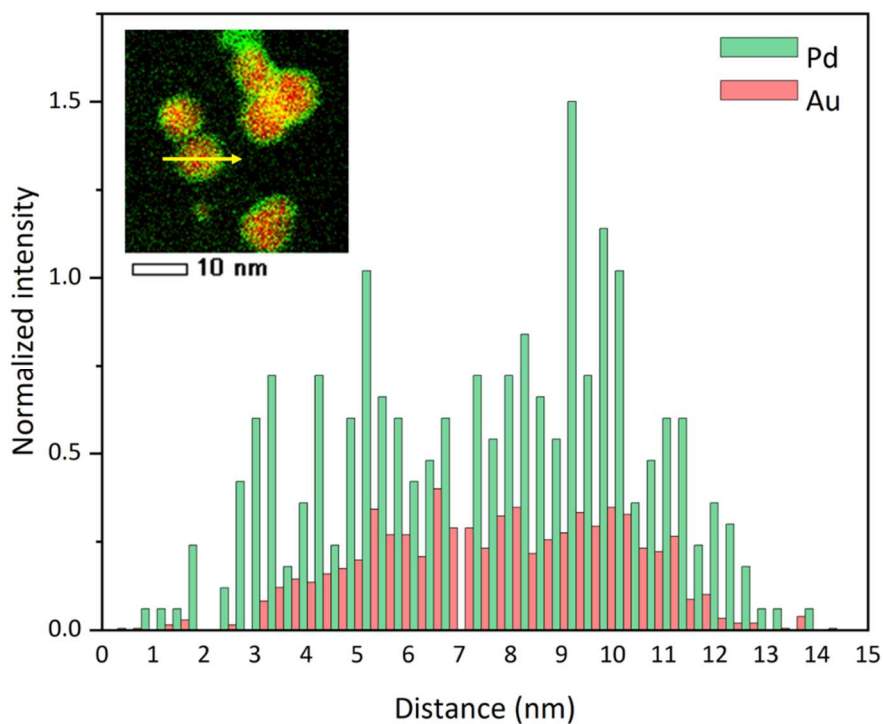

Fig. S2 Line profiles across an Au@Pd particle. The line scan was conducted as indicated by a yellow arrow in the inset image. The intensity was normalized with the atomic ratio of Au and Pd.

Table S1 Photocatalytic decarboxylation deuteration of lauric acid with heavy water over various Pd-Au/TiO<sub>2</sub> photocatalyst samples.<sup>a</sup>

| Entry | M/TiO <sub>2</sub> sample <sup>b</sup> | Product <sup>c</sup> (μmol) |                   |                 | $Y_{C_{11-d}}$<br>(%) <sup>d</sup> | $Y_{total}$<br>(%) <sup>e</sup> | $S_d$<br>(%) <sup>f</sup> | $R_d$<br>(%) <sup>g</sup> |
|-------|----------------------------------------|-----------------------------|-------------------|-----------------|------------------------------------|---------------------------------|---------------------------|---------------------------|
|       |                                        | C <sub>11-d</sub>           | C <sub>11-h</sub> | C <sub>22</sub> |                                    |                                 |                           |                           |
| 1     | Au1@Pd2                                | 17.2                        | 3.52              | 0.51            | 34.4                               | 43.5                            | 79.1                      | 83.0                      |
| 2     | Pd2/Au1                                | 13.5                        | 4.98              | 0.94            | 27.1                               | 44.2                            | 66.3                      | 73.1                      |
| 3     | Au1/Pd2                                | 10.0                        | 4.40              | 0.59            | 20.1                               | 31.2                            | 64.2                      | 69.5                      |
| 4     | Pd2(PD)/Au1(CR)                        | 7.1                         | 5.51              | 0.71            | 14.2                               | 28.0                            | 50.5                      | 56.2                      |

<sup>a</sup> Reaction conditions; catalyst 50 mg, the reaction mixture (5 mL) containing LA 40 mg (50 μmol) in D<sub>2</sub>O (3 mL) and CH<sub>3</sub>CN (2 mL), reaction time 3 h, light wavelength > 360 nm, irradiated light intensity 41 mW cm<sup>-2</sup> when measured at 360 ± 20 nm. Pre-heating was conducted before the reaction. <sup>b</sup> Employed TiO<sub>2</sub> was of anatase (ST-01). <sup>c</sup> C<sub>11-d</sub> = *n*-undecane-*d*, C<sub>11</sub>H<sub>23</sub>D, C<sub>11-h</sub> = *n*-undecane-*h*, C<sub>11</sub>H<sub>24</sub>, C<sub>22</sub> = *n*-docosane; <sup>d</sup> Yield of *n*-undecane-*d*,  $Y_{C_{11-d}} (%) = 100 \times A_{undecane-d} / A_{initial\ lauric\ acid}$ ; <sup>e</sup>  $Y_{total} (%) = 100 \times (A_{undecane-d} + A_{undecane-h} + 2 \times A_{docosane}) / A_{initial\ lauric\ acid}$ ; <sup>f</sup> Selectivity of C<sub>11-d</sub> to the obtained main products (C<sub>11</sub> and C<sub>22</sub>)  $S_d (%) = 100 \times A_{undecane-d} / (A_{undecane-h} + A_{undecane-d} + 2 \times A_{docosane})$ . <sup>g</sup> Ratio of undecane-*d* to sum of undecane-*d* and undecane-*h*,  $R_d (%) = 100 \times A_{undecane-d} / (A_{undecane-h} + A_{undecane-d})$ .

Table S2 Results of photocatalytic reaction test over several catalyst samples prepared under various light intensity <sup>a</sup>.

| Entry | Deposition                                |                         | Product yield (%) |                   |                 |                 |           |           |
|-------|-------------------------------------------|-------------------------|-------------------|-------------------|-----------------|-----------------|-----------|-----------|
|       | light intensity<br>(mW cm <sup>-2</sup> ) | Irradiation<br>time (h) | C <sub>11-d</sub> | C <sub>11-h</sub> | C <sub>22</sub> | $Y_{total} (%)$ | $S_d (%)$ | $R_d (%)$ |
| 1     | 76.2                                      | 1                       | 34.44             | 7.04              | 2.04            | 43.53           | 79.1      | 83.0      |
| 2     | 38.1                                      | 1                       | 31.83             | 10.38             | 2.00            | 44.21           | 72.0      | 75.4      |
| 3     | 19.1                                      | 1                       | 25.19             | 10.59             | 1.60            | 37.38           | 67.4      | 70.4      |
| 4     | 9.5                                       | 1                       | 18.00             | 10.13             | 2.67            | 30.79           | 58.4      | 64.0      |
| 5     | 9.5                                       | 2                       | 26.33             | 7.88              | 3.08            | 37.28           | 70.6      | 77.0      |

<sup>a</sup> Reaction conditions; Au1@Pd2/TiO<sub>2</sub> catalyst 50 mg. For other conditions, see the caption of Table S1.

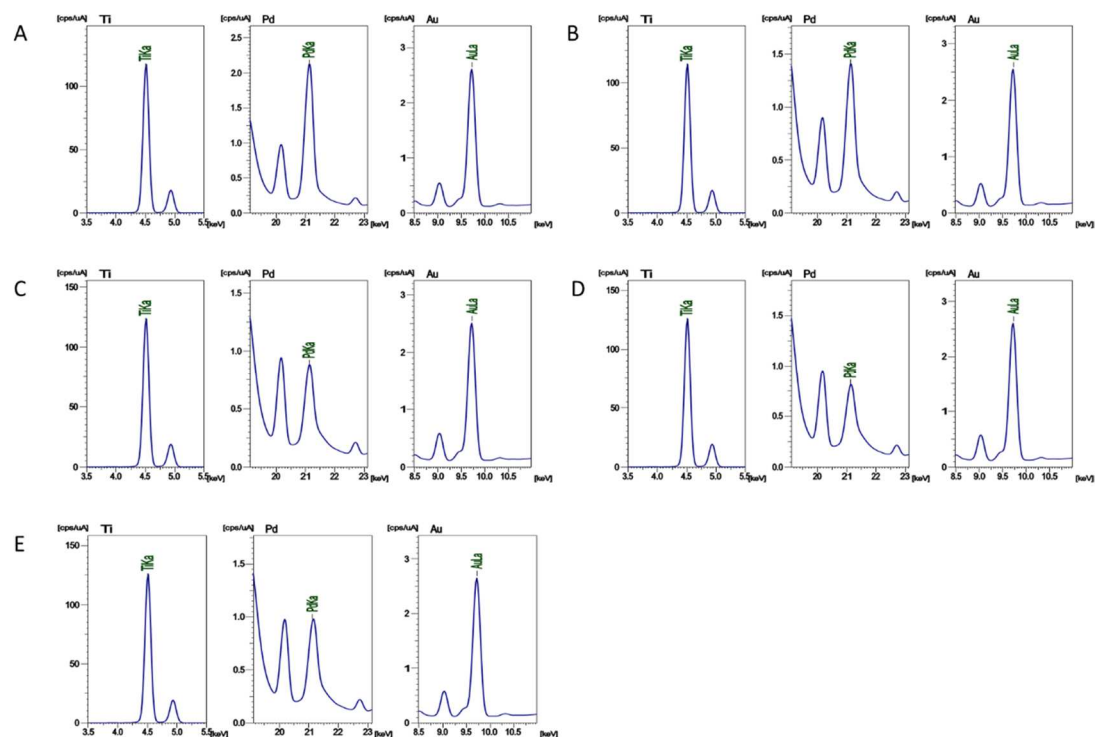

Fig. S3 XRF spectra of each element, Ti, Pd, and Au in the Au1@Pd2/TiO<sub>2</sub> catalysts prepared under different photodeposition light intensities: (A) 76.2, (B) 38.1, (C) 19.1, and (D) 9.5 mW cm<sup>-2</sup> for 1h, and (E) 9.5 mW cm<sup>-2</sup> for 2 h. The actual contents of the samples are listed in Table 1.

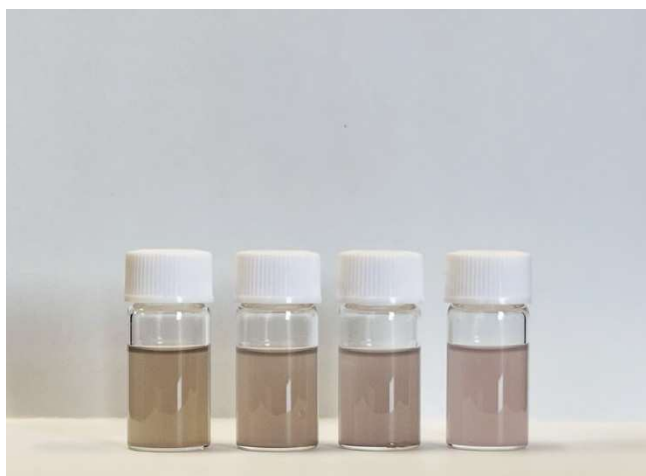

Fig. S4 Photos of the Au1@Pd2/TiO<sub>2</sub> samples prepared under various SPD light intensity; (left to right) 76.2, 38.1, 19.1, and 9.5 mW cm<sup>-2</sup>. To enhance the visibility of the sample color, the sample was dispersed in ethanol.

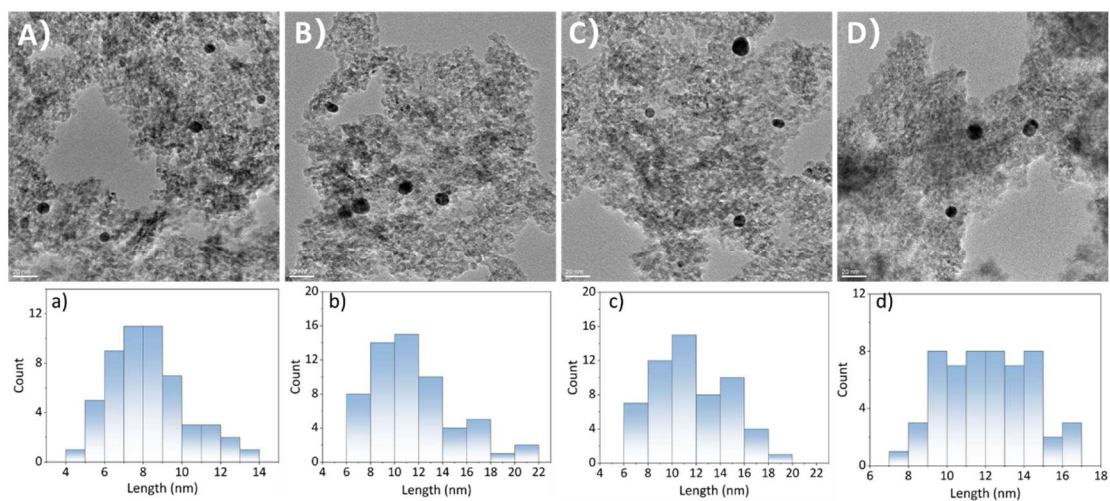

Fig. S5 TEM images of Au1/TiO<sub>2</sub> catalysts prepared under different photodeposition light intensities: (A) 76.2, (B) 38.1, (C) 19.1, and (D) 9.5 mW cm<sup>-2</sup> and the corresponding particle size distribution (a-d).

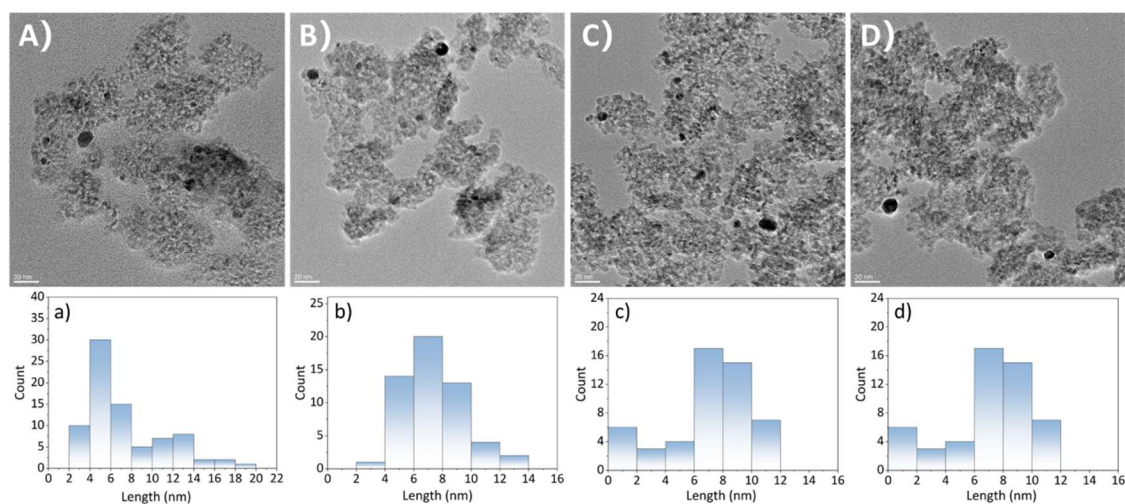

Fig. S6 TEM images of Au1@Pd2/TiO<sub>2</sub> catalysts prepared under different photodeposition light intensities: (A) 76.2, (B) 38.1, (C) 19.1, and (D) 9.5 mW cm<sup>-2</sup> and the corresponding particle size distribution (a-d).

Table S3 Photocatalytic decarboxylation deuteration of lauric acid over Au1/TiO<sub>2</sub> catalyst samples by different preparation methods <sup>a</sup>.

| Entry | Light intensity<br>(mW cm <sup>-2</sup> ) | Product yield (%)        |                          |                        | <i>Y</i> <sub>total</sub> (%) | <i>S</i> <sub>d</sub> (%) | <i>R</i> <sub>d</sub> (%) |
|-------|-------------------------------------------|--------------------------|--------------------------|------------------------|-------------------------------|---------------------------|---------------------------|
|       |                                           | <i>C</i> <sub>11-d</sub> | <i>C</i> <sub>11-h</sub> | <i>C</i> <sub>22</sub> |                               |                           |                           |
| 1     | 76.2                                      | 13.96                    | 10.37                    | 3.75                   | 43.53                         | 49.7                      | 57.4                      |
| 2     | 38.1                                      | 8.37                     | 12.90                    | 2.69                   | 44.21                         | 34.9                      | 39.4                      |
| 3     | 19.1                                      | 9.01                     | 13.34                    | 2.65                   | 25.00                         | 36.0                      | 40.3                      |
| 4     | 9.5                                       | 5.86                     | 13.52                    | 1.88                   | 21.25                         | 27.6                      | 30.2                      |

<sup>a</sup> Reaction conditions: Au1/TiO<sub>2</sub> catalyst 50 mg, the reaction mixture (5 mL) containing LA 40 mg (50 μmol), in D<sub>2</sub>O (3 mL) and CH<sub>3</sub>CN (2 mL), reaction time 3 h, light wavelength > 360 nm, irradiated light intensity 41 mW cm<sup>-2</sup> when measured at 360 ± 20 nm. Pre-heating was conducted before the reaction. For other conditions, see the caption of Table S1.

Table S4 Photocatalytic decarboxylation deuteration of lauric acid over the Au1@Pd2/TiO<sub>2</sub> catalyst samples by different sacrificial reagents <sup>a</sup>.

| Entry | Sacrificial reagent | Loading (wt%) <sup>b</sup> |      | Product yield (%)        |                          |                        | <i>Y</i> <sub>total</sub> (%) | <i>S</i> <sub>d</sub> (%) | <i>R</i> <sub>d</sub> (%) |
|-------|---------------------|----------------------------|------|--------------------------|--------------------------|------------------------|-------------------------------|---------------------------|---------------------------|
|       |                     | Au                         | Pd   | <i>C</i> <sub>11-d</sub> | <i>C</i> <sub>11-h</sub> | <i>C</i> <sub>22</sub> |                               |                           |                           |
| 1     | methanol            | 1.09                       | 2.04 | 34.4                     | 7.04                     | 2.04                   | 43.5                          | 79.1                      | 83.0                      |
| 2     | ethanol             | 1.09                       | 1.91 | 30.6                     | 7.67                     | 1.42                   | 39.7                          | 77.1                      | 79.9                      |
| 3     | 2-propanol          | 1.02                       | 1.98 | 24.5                     | 9.25                     | 1.64                   | 35.3                          | 69.2                      | 72.6                      |
| 4     | acetic acid         | 1.03                       | 2.01 | 19.5                     | 9.36                     | 2.20                   | 31.0                          | 62.7                      | 67.5                      |
| 5     | ethylene glycol     | 1.17                       | 2.34 | 21.3                     | 10.6                     | 2.83                   | 34.7                          | 61.4                      | 66.9                      |

<sup>a</sup> Reaction conditions: Au1@Pd2/TiO<sub>2</sub> catalyst 50 mg. For other conditions, see the caption of Table S1.

<sup>b</sup> The intended loading amounts for each sample were 1 and 2 wt% for Au and Pd, respectively. The loading amount is determined by XRF. The XRF spectra are shown in Fig. S5.

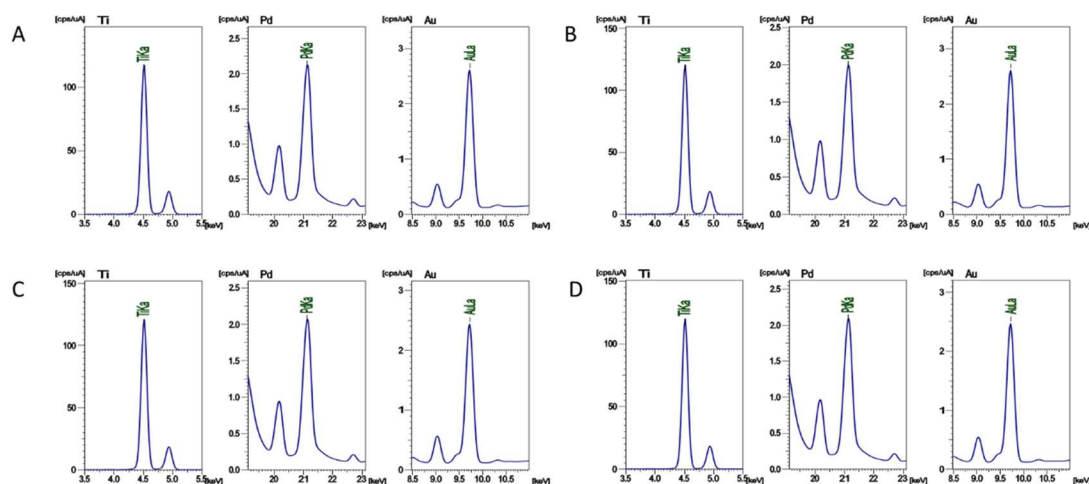

Fig. S7 XRF spectra of each element, Ti, Pd, and Au in the Au1@Pd2/TiO<sub>2</sub> catalysts prepared using various sacrificial reagent: (A) methanol, (B) ethanol, (C) 2-propanol, and (D) acetic acid. The actual contents of the samples are listed in Table 2.



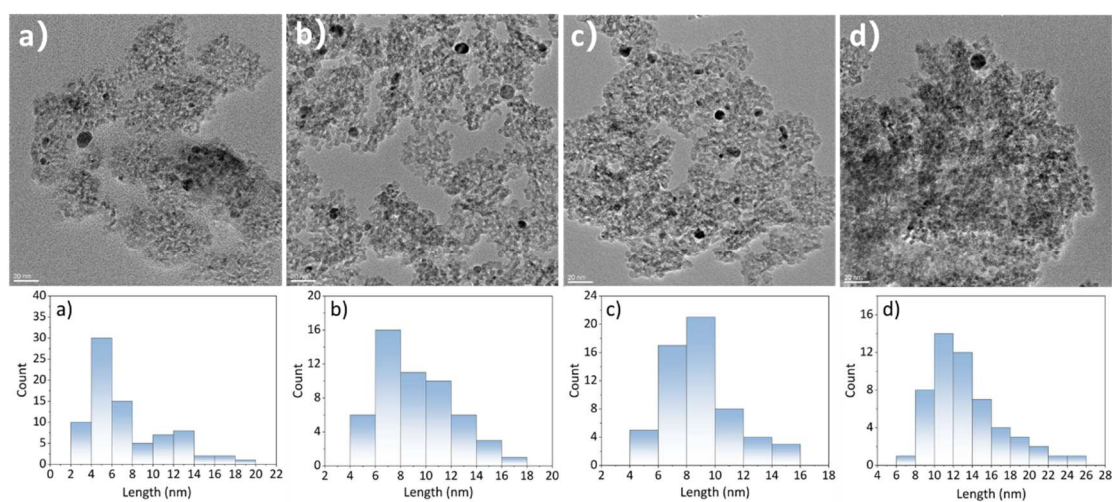

Fig. S8 TEM images of Au1@Pd2/TiO<sub>2</sub> catalysts prepared using various sacrificial reagent: (A) methanol, (B) ethanol, (C) 2-propanol, and (D) acetic acid and the corresponding particle size distribution (a–d).

Table S5 Photocatalytic decarboxylation deuteration of lauric acid over the Au1@Pd2/Ptx/TiO<sub>2</sub> catalyst samples by different preparation methods <sup>a</sup>.

| Entry | Au1@Pd2/Ptx/TiO <sub>2</sub><br>samples | Product yield (%)        |                          |                        | <i>Y</i> <sub>total</sub> (%) | <i>S</i> <sub>d</sub> (%) | <i>R</i> <sub>d</sub> (%) |
|-------|-----------------------------------------|--------------------------|--------------------------|------------------------|-------------------------------|---------------------------|---------------------------|
|       |                                         | <i>C</i> <sub>11-d</sub> | <i>C</i> <sub>11-h</sub> | <i>C</i> <sub>22</sub> |                               |                           |                           |
| 1     | 0.01                                    | 26.82                    | 6.00                     | 1.72                   | 34.54                         | 77.7                      | 81.7                      |
| 2     | 0.1                                     | 24.89                    | 7.41                     | 1.32                   | 33.62                         | 74.0                      | 77.1                      |
| 3     | 0.5                                     | 23.32                    | 7.58                     | 2.03                   | 32.93                         | 70.8                      | 75.5                      |
| 4     | 1.0                                     | 11.24                    | 8.60                     | 0.21                   | 20.06                         | 56.0                      | 56.6                      |

<sup>a</sup> Reaction conditions: catalyst 50 mg, the reaction mixture (5 mL) containing LA 40 mg (50 μmol), in D<sub>2</sub>O (3 mL) and CH<sub>3</sub>CN (2 mL), reaction time 3 h, light wavelength > 360 nm, irradiated light intensity 41 mW cm<sup>-2</sup> when measured at 360 ± 20 nm. Pre-heating was conducted before the reaction. See the caption of Table S1 for other conditions.

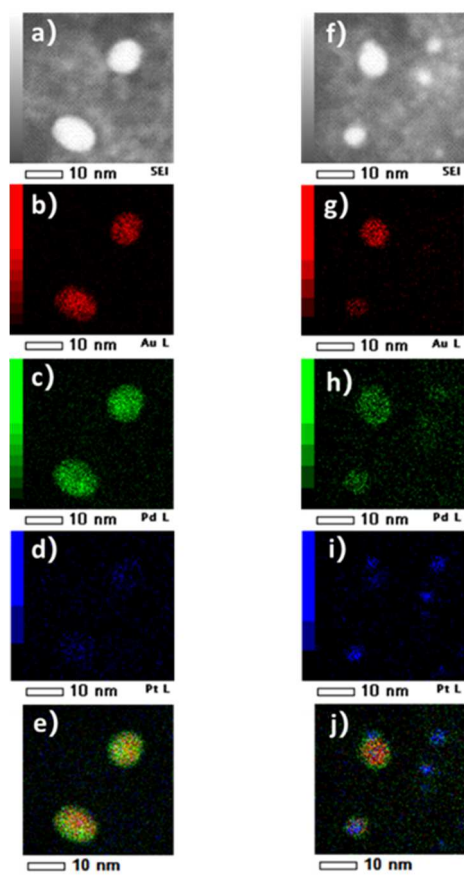

Fig. S9 STEM-EDX elemental mapping of the: (a–e) Au<sub>1</sub>@Pd<sub>2</sub>/Pt<sub>0.01</sub>/TiO<sub>2</sub> and (f–j) Au<sub>1</sub>@Pd<sub>2</sub>/Pt<sub>1.0</sub>/TiO<sub>2</sub> catalysts.



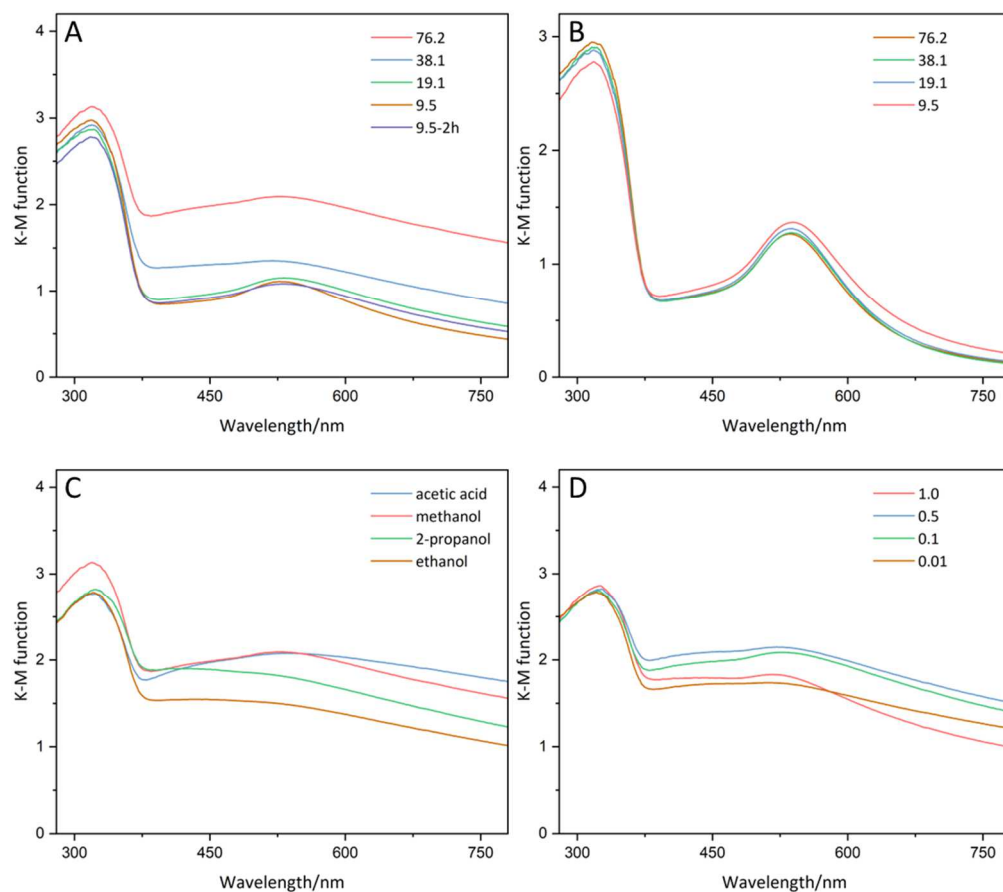

Fig. S10 DR UV-vis spectra of various samples, (A) Au1@Pd2/TiO<sub>2</sub> prepared under series PD light intensity, (B) Au1/TiO<sub>2</sub> prepared under series PD light intensity, (C) Au1@Pd2/TiO<sub>2</sub> prepared using various PD sacrificial reagent, and (D) Au1@Pd2/Ptx/TiO<sub>2</sub>,  $x=1.0, 0.5, 0.1$ , and  $0.01$  wt%.

## References

- S1 H. Huang, A. Yamamoto, R. Sugiyama, A. Tanaka, H. Kominami and H. Yoshida, *Catal Today*, 2026, **461**, 115520.
